# Supplementary material for: Risk Perception for Diabetes Among Women With Histories of Gestational Diabetes Mellitus
Source: Oxford University Press journal article supplement (doi:10.2337/dc07-0618), 2007-08-28
Supplement: dc070618onlineappendixtable.doc [file dc070618onlineappendixtable.doc]

| Appendix Table. Risk perception items among women with histories of gestational diabetes. | | |
| --- | --- | --- |
| R indicates that the item needs to be reverse scored. | Cronbach's α |  |
|  |  |  |
| Diabetes risk knowledge-risk of getting diabetes (***sum*** of correct responses) | 0.70 |  |
| Being Asian-American |  |  |
| Being Caucasian (white) |  |  |
| Eating a healthy diet |  |  |
| Being Black or African-American |  |  |
| Being Hispanic |  |  |
| Having had diabetes during pregnancy |  |  |
| Having a blood relative with diabetes |  |  |
| Being 65 years of age or older |  |  |
| Exercising regularly |  |  |
| Being American Indian |  |  |
| Controlling weight gain |  |  |
|  |  |  |
| Personal control (***average*** the Likert scores) | 0.72 |  |
| I feel that I have little control over risks to my health. |  |  |
| If I am going to get diabetes, there is not much I can do about it. |  |  |
| **R-**I think that my personal efforts will help control my risks of getting diabetes. |  |  |
| **R-**People who make a good effort to control the risks of getting diabetes are |  |  |
| much less likely to get diabetes. |  |  |
|  |  |  |
| Optimistic bias (***average*** the Likert scores) | 0.65 |  |
| **R-**Compared to other women of my same age, I am less likely than they are |  |  |
| to get diabetes |  |  |
| **R-**Compared to other women of my same age, I am less likely than they are |  |  |
| to get a serious disease |  |  |
|  |  |  |
| Benefits and barriers of preventive behaviors ***(average*** the Likert scores*)* | not applicable |  |
| Doing regular exercise and following a diet take a lot of effort |  |  |
| **R**-Benefits of following a diet and exercise program outweigh the effort to do it. |  |  |
| **R-**Regular exercise and diet may prevent diabetes from developing |  |  |
